# Supplementary material for: Encouraging entrepreneurship in university labs: Research activities, research outputs, and early doctorate careers
Source: PLoS One. 2017 Feb 8;12(2):e0170444. doi: 10.1371/journal.pone.0170444 (PMC5298308; doi:10.1371/journal.pone.0170444)
Supplement: S1 Table — (XLSX) [file pone.0170444.s001.xlsx]

## Sheet: S1
S1 Table. Encouragement of Entrepreneurship by Science & Engineering Field
	Obs.	Entrepreneurship encouraged	Indifferent to entrepreneurship	Entrepreneurship discouraged
BIOLOGICAL/LIFE SCIENCES		0.244	0.641	0.115
Biochemistry/biophysics	429	0.3077	0.62	0.0723
Cell/molecular biology	459	0.2745	0.6318	0.0937
Developmental biology/embryology	93	0.2366	0.6882	0.0753
Ecology	258	0.1434	0.7519	0.1047
Genetics	241	0.2241	0.6224	0.1535
Immunology	146	0.2397	0.6233	0.137
Microbiology	216	0.2685	0.5787	0.1528
Neuroscience	388	0.2268	0.6366	0.1366
Pharmacology	88	0.3295	0.5	0.1705
CHEMISTRY		0.456	0.495	0.049
Analytical chemistry	88	0.5341	0.4545	0.0114
Inorganic chemistry	138	0.413	0.529	0.058
Organic chemistry	205	0.5171	0.439	0.0439
Physical chemistry	211	0.4076	0.5355	0.0569
PHYSICS		0.255	0.674	0.071
Astronomy/astrophysics	131	0.1908	0.7176	0.0916
Biophysics	90	0.2889	0.6444	0.0667
Condensed matter/low-temp. physics	240	0.3167	0.6333	0.05
Optics/photonics	80	0.3125	0.65	0.0375
Nuclear physics	65	0.2615	0.6462	0.0923
Particle physics	188	0.1755	0.6809	0.1436
Applied physics	68	0.3235	0.6471	0.0294
ENGINEERING		0.469	0.501	0.03
Aerospace/aeronautical engineering	74	0.3784	0.5676	0.0541
Bioengineering/biomedical	401	0.5436	0.4389	0.0175
Chemical engineering	334	0.494	0.482	0.024
Computer engineering	148	0.5135	0.4527	0.0338
Electrical engineering	328	0.4848	0.4939	0.0213
Mechanical engineering	265	0.4	0.5623	0.0377
Materials Science	222	0.3919	0.5586	0.0495
Computer science	716	0.426	0.5321	0.0419
Total	6310	0.3472	0.5813	0.0715
