# Supplementary material for: Encouraging entrepreneurship in university labs: Research activities, research outputs, and early doctorate careers
Source: PLoS One. 2017 Feb 8;12(2):e0170444. doi: 10.1371/journal.pone.0170444 (PMC5298308; doi:10.1371/journal.pone.0170444)
Supplement: S4 Table — (XLSX) [file pone.0170444.s004.xlsx]

## Sheet: S4
S4 Table. Encouragement of Entrepreneurship and Career Interests by S&E Field
		Academic Career Preferences			Entrepreneurship Career Preferences
	Obs.	Entrepreneurship encouraged	Entrepreneurship not encouraged		Encourage entrepreneurship	Do not encourage entrepreneurship
BIOLOGICAL/LIFE SCIENCES		0.716	0.693		0.609	0.406
Biochemistry/biophysics	429	0.667	0.614		0.642	0.532
Cell/molecular biology	459	0.639	0.646		0.593	0.439
Developmental biology/embryology	93	0.762	0.6		0.429	0.429
Ecology	258	0.788	0.766		0.485	0.215
Genetics	241	0.725	0.707		0.549	0.414
Immunology	146	0.656	0.702		0.875	0.471
Microbiology	216	0.727	0.616		0.6	0.429
Neuroscience	388	0.854	0.834		0.598	0.372
Pharmacology	88	0.63	0.491		0.704	0.455
CHEMISTRY		0.545	0.508		0.538	0.535
Analytical chemistry	88	0.442	0.436		0.605	0.513
Inorganic chemistry	138	0.654	0.579		0.519	0.5
Organic chemistry	205	0.426	0.522		0.578	0.696
Physical chemistry	211	0.659	0.505		0.494	0.477
PHYSICS		0.828	0.758		0.654	0.459
Astronomy/astrophysics	131	0.85	0.8		0.65	0.39
Biophysics	90	0.792	0.557		0.583	0.443
Condensed matter/low-temp. physics	240	0.806	0.737		0.627	0.52
Optics/photonics	80	0.75	0.679		0.667	0.717
Nuclear physics	65	0.75	0.674		0.625	0.304
Particle physics	188	0.933	0.91		0.767	0.406
Applied physics	68	0.8	0.714		0.667	0.561
ENGINEERING		0.702	0.602		0.723	0.609
Aerospace/aeronautical engineering	74	0.76	0.667		0.56	0.5
Bioengineering/biomedical	401	0.649	0.561		0.798	0.655
Chemical engineering	334	0.673	0.497		0.678	0.704
Computer engineering	148	0.721	0.691		0.794	0.721
Electrical engineering	328	0.745	0.669		0.729	0.635
Mechanical engineering	265	0.75	0.612		0.604	0.493
Materials Science	222	0.671	0.563		0.756	0.563
Computer science	716	0.752	0.79		0.718	0.63
Total	6310	0.703	0.678		0.657	0.488
